# Supplementary material for: BIOPSYCHOSOCIAL REHABILITATION IN THE WORKING POPULATION WITH CHRONIC LOW BACK PAIN: A CONCEPT ANALYSIS
Source: PubMed Central journal article supplement — J Rehabil Med. 2024 Jan 16;56:13454. doi: 10.2340/jrm.v56.13454 (PMC10802789; doi:10.2340/jrm.v56.13454), 2024-01-16
Supplement: JRM-56-13454-s1.pdf [file JRM-56-13454-s1.pdf]

Supplementary material XXX has been published as submitted. It has not been copyedited, typeset or checked for scientific content by Journal of Rehabilitation Medicine

**Table SI.** Search string used in MEDLINE (via the PubMed interface).

**SEARCH STRING**

|                             |                                                                                                                                                                                                                                                                                                                                                                                                                                                                                                                                                                                                                                                           |
|-----------------------------|-----------------------------------------------------------------------------------------------------------------------------------------------------------------------------------------------------------------------------------------------------------------------------------------------------------------------------------------------------------------------------------------------------------------------------------------------------------------------------------------------------------------------------------------------------------------------------------------------------------------------------------------------------------|
| <b>MEDLINE (VIA PUBMED)</b> | (("low" OR "lower") AND (back OR lumb* OR sciatic*) AND ("pain" OR "ache") AND ("chronic"[tiab] OR "recurr*"[tiab] OR "enduring"[tiab] OR "long lasting"[tiab] OR "continuing"[tiab]) OR "lumbago"[tiab] OR "back pain"[MeSH] OR "sciatica"[MeSH])<br><br>AND<br><br>("models, biopsychosocial"[MeSH] OR "biopsychosocial model"[tiab] OR ("biopsychosocial"[tiab] OR "interdisciplinary"[tiab] OR "multiprofessional"[tiab] OR "multidisciplinary"[tiab] OR "multimodal"[tiab]) OR "patient care team"[MeSH] OR "patient care team"[tiab])<br><br>AND<br><br>("rehabilitation"[MeSH] OR "rehabilit*"[tiab] OR "intervention*"[tiab] OR "program*"[tiab]) |
|-----------------------------|-----------------------------------------------------------------------------------------------------------------------------------------------------------------------------------------------------------------------------------------------------------------------------------------------------------------------------------------------------------------------------------------------------------------------------------------------------------------------------------------------------------------------------------------------------------------------------------------------------------------------------------------------------------|
